# Supplementary material for: Crystalline structure and thermotropic behavior of alkyltrimethylphosphonium amphiphiles
Source: Royal Society of Chemistry journal article supplement (doi:10.1039/c6cp08304h), 2017-01-01
Supplement: c6cp08304h1.pdf [file c6cp08304h1.pdf]

## Electronic Supplementary Information

### Crystalline Structure and Thermotropic Behavior of Alkyltrimethylphosphonium Amphiphiles

Ana Gamarra, Lourdes Urpí, Antxon Martínez de Ilarduya  
and Sebastián Muñoz-Guerra\*

*Departament d'Enginyeria Química, Universitat Politècnica de Catalunya, ETSEIB,  
Diagonal 647, Barcelona 08028, Spain.*

E-mail: [sebastian.munoz@upc.edu](mailto:sebastian.munoz@upc.edu)

## Contents

### Experimental procedures

1. General procedure for the synthesis of trimethylalkylphosphonium salts ( $n$ ATMP·Br)
2. Methodology used for the single-crystal analysis.

### Figures

**Fig. SI-1.**  $^1\text{H}$  NMR spectra of  $n$ ATMP·Br surfactants.

**Fig. SI-2.** Comparison of FT-IR spectra of  $n$ ATMP·Br surfactants.

**Fig. SI-3.** Comparison of the above 0 °C Krafft temperatures for  $n$ ATMP·Br and  $n$ ATMA·Br surfactants (a), plot of the methyl chemical shift of 12ATMP·Br against concentration at 25 °C with indication of the *cmc*. Inset: evolution of the  $^1\text{H}$  NMR methyl signal of 12ATMP·Br with concentration (b), and comparison of the *cmc* determined by  $^1\text{H}$  NMR for  $n$ ATMP·Br and  $n$ ATMA·Br with  $n=12, 14$  and  $16$  (c).

**Fig. SI-4.** a) TGA derivative curves of  $n$ ATMP·Br surfactants. (b) Isothermal trace of 18ATMP·Br registered at 280 °C.

**Fig. SI-5.** TGA traces of  $n$ ATMA·Br recorded under a nitrogen atmosphere (a) and their corresponding derivative curves (b).

**Fig. SI-6.** Optical micrograph recorded from the single-crystal of 12ATMP·Br which was obtained by vapor diffusion and used for XRD analysis.

**Fig. SI-7.** ORTEP representation of the 12ATMP·Br molecule in the conformation adopted in the crystal with atom labelling indication. The displacement ellipsoids are drawn at 50% probability levels and H atoms are drawn as small empty circles of arbitrary radius.

**Fig. SI-8.** SAXS (left) and WAXS (right) plots from 12ATMP·Br registered over the 10-280 °C interval. a) heating, b) cooling and c) reheating.

**Fig. SI-9.** SAXS (left) and WAXS (right) plots from 14ATMP·Br registered over the 0-300 °C interval. a) heating, b) slow cooling, c) fast cooling and d) reheating.

**Fig. SI-10.** SAXS (left) and WAXS (right) plots from 16ATMP·Br registered over the 10-280 °C interval. a) heating, b) cooling and c) reheating.

**Fig. SI-11.** SAXS (left) and WAXS (right) plots from 18ATMP·Br registered over the 10-280 °C interval. a) heating, b) cooling and c) reheating.

**Fig. SI-12.** SAXS (left) and WAXS (right) plots from 20ATMP·Br registered over the 0-300 °C interval. a) heating, b) slow cooling, c) fast cooling and d) reheating.

**Fig. SI-13.** SAXS (left) and WAXS (right) plots from 22ATMP·Br registered over the 10-280 °C interval. a) heating, b) cooling and c) reheating.

**Fig. SI-14.** Graphical comparison of the observed (at 25 °C) and calculated main *d*-spacings (nm) with  $h \neq 0$  for *n*ATMP·Br.

**Fig. SI-15.** POM micrographs recorded from *n*ATMP·Br at the indicated temperatures.

## Tables

**Table SI-1.** Crystal data and structure refinement for 12ATMP·Br.

**Table SI-2.** Atomic coordinates ( $\times 10^4$ ) and equivalent isotropic displacement parameters ( $\text{\AA}^2 \times 10^3$ ) for 12ATMP·Br. U (eq) is defined as one third of the trace of the orthogonalized U<sub>ij</sub> tensor.

**Table SI-3.** Torsion angles (°) for 12ATMP·Br.

**Table SI-4.** Crystallographic *a* and *β* values of the *n*ATMP·Br salts used for modelling and the crystal lattices from which SAXS and WAXS profiles were simulated.

## Contents

### Experimental procedures

#### 1. General procedure for the synthesis of trimethylalkylphosphonium salts (*n*ATMP·Br)

1-bromoalkane (5.5 mmol) was placed in a flask immersed into an oil bath (80 °C) and under a nitrogen atmosphere. After heating for several minutes, the trimethylphosphine (TMP) was slowly added (5 mL, 5 mmol). The mixture was heated up to 116 °C and stirred for a period of 18 to 24 h depending on the bromoalkane used. The precipitate that appeared upon cooling to room temperature, was collected by filtration, washed several times to remove the excess of alkylbromide, and finally dried under high vacuum.

#### Dodecyltrimethylphosphonium bromide (12ATMP·Br)

TMP and 1.3 mL of 1-bromododecane gave after 16 h stirring 1.14 g (70%) of the product as a white powder. The chemical structure was ascertained by <sup>1</sup>H NMR, <sup>13</sup>C NMR, FT-IR and elemental analysis. <sup>1</sup>H NMR (300.1 MHz; CDCl<sub>3</sub>; δ(ppm)): 2.46 (2H, m, RCH<sub>2</sub>P<sup>+</sup>), 2.25 and 2.20 (9H, d, P<sup>+</sup>(CH<sub>3</sub>)<sub>3</sub>), 1.55 (4H, m, RCH<sub>2</sub>CH<sub>2</sub>CH<sub>2</sub>P<sup>+</sup>), 1.25 (16H, m, CH<sub>3</sub>-(CH<sub>2</sub>)<sub>8</sub>-CH<sub>2</sub> CH<sub>2</sub>P<sup>+</sup>), 0.88 (3H, t, CH<sub>3</sub>-(CH<sub>2</sub>)<sub>11</sub>-P<sup>+</sup>), <sup>13</sup>C NMR (75.5 MHz; CDCl<sub>3</sub>; δ(ppm)): 31.9 (CH<sub>3</sub>-CH<sub>2</sub>-CH<sub>2</sub>R), 30.6 (CH<sub>3</sub>-CH<sub>2</sub>-CH<sub>2</sub>.CH<sub>2</sub>R), 30.4-29.0 (CH<sub>3</sub>-CH<sub>2</sub>-CH<sub>2</sub>-(CH<sub>2</sub>)<sub>5</sub>R), 24.1 (RCH<sub>2</sub>CH<sub>2</sub>CH<sub>2</sub>P<sup>+</sup>), 23.4 (RCH<sub>2</sub>P<sup>+</sup>), 22.6 (CH<sub>3</sub>- CH<sub>2</sub>R), 21.8 (RCH<sub>2</sub>-CH<sub>2</sub>-P<sup>+</sup>), 14.1 (CH<sub>3</sub>R), 9.4 and 8.6 (P<sup>+</sup>(CH<sub>3</sub>)<sub>3</sub>). FT-IR (ν(cm<sup>-1</sup>)): 2913, 2847, 1471, 972, 705. Elemental analysis: C (%): 55.53; found: 55.53, H (%): 10.59; found: 10.50.

#### Tetradecyltrimethylphosphonium bromide (14ATMP·Br)

TMP and 1.5 mL of 1-bromotetradecane gave after 17 h stirring 1.43 g (80%) of the product as a white powder. The chemical structure was ascertained by <sup>1</sup>H NMR, <sup>13</sup>C NMR, FT-IR and elemental analysis. <sup>1</sup>H NMR (300.1 MHz; CDCl<sub>3</sub>; δ(ppm)): 2.46 (2H, m, RCH<sub>2</sub>P<sup>+</sup>), 2.25 and 2.20 (9H, d, P<sup>+</sup>(CH<sub>3</sub>)<sub>3</sub>), 1.55 (4H, m, RCH<sub>2</sub>CH<sub>2</sub>CH<sub>2</sub>P<sup>+</sup>), 1.25 (20H, m, CH<sub>3</sub>-(CH<sub>2</sub>)<sub>10</sub>-CH<sub>2</sub> CH<sub>2</sub>P<sup>+</sup>), 0.88 (3H, t, CH<sub>3</sub>-(CH<sub>2</sub>)<sub>13</sub>-P<sup>+</sup>), <sup>13</sup>C NMR (75.5 MHz; CDCl<sub>3</sub>; δ(ppm)): 31.9 (CH<sub>3</sub>-CH<sub>2</sub>-CH<sub>2</sub>R), 30.6 (CH<sub>3</sub>-CH<sub>2</sub>-CH<sub>2</sub>.CH<sub>2</sub>R), 30.4-29.0 (CH<sub>3</sub>-CH<sub>2</sub>-CH<sub>2</sub>-(CH<sub>2</sub>)<sub>7</sub>R), 24.1 (RCH<sub>2</sub>CH<sub>2</sub>CH<sub>2</sub>P<sup>+</sup>), 23.4 (RCH<sub>2</sub>P<sup>+</sup>), 22.6 (CH<sub>3</sub>- CH<sub>2</sub>R), 21.8 (RCH<sub>2</sub>-CH<sub>2</sub>-P<sup>+</sup>), 14.1 (CH<sub>3</sub>R), 9.4 and 8.6 (P<sup>+</sup>(CH<sub>3</sub>)<sub>3</sub>). FT-IR (ν(cm<sup>-1</sup>)): 2911, 2856, 1469, 978, 718. Elemental analysis: C (%): 57.92; found: 58.03, H (%): 10.90; found: 10.79.

#### Hexadecyltrimethylphosphonium bromide (16ATMP·Br)

TMP and 1.7 mL of 1-bromohexadecane gave after 18 h stirring 1.62 g (85%) of the product as a white powder. The chemical structure was ascertained by <sup>1</sup>H NMR, <sup>13</sup>C NMR, FT-IR and elemental analysis. <sup>1</sup>H NMR (300.1 MHz; CDCl<sub>3</sub>; δ(ppm)): 2.47 (2H, m, RCH<sub>2</sub>P<sup>+</sup>), 2.25 and 2.20 (9H, d, P<sup>+</sup>(CH<sub>3</sub>)<sub>3</sub>), 1.55 (4H, m, RCH<sub>2</sub>CH<sub>2</sub>CH<sub>2</sub>P<sup>+</sup>), 1.25 (24H, m, CH<sub>3</sub>-(CH<sub>2</sub>)<sub>12</sub>-CH<sub>2</sub> CH<sub>2</sub>P<sup>+</sup>), 0.88 (3H, t, CH<sub>3</sub>-(CH<sub>2</sub>)<sub>15</sub>-P<sup>+</sup>), <sup>13</sup>C NMR (75.5 MHz; CDCl<sub>3</sub>): 31.9 (CH<sub>3</sub>-CH<sub>2</sub>-CH<sub>2</sub>R), 30.6 (CH<sub>3</sub>-CH<sub>2</sub>-CH<sub>2</sub>.CH<sub>2</sub>R), 30.4-29.0 (CH<sub>3</sub>-CH<sub>2</sub>-CH<sub>2</sub>-(CH<sub>2</sub>)<sub>9</sub>R), 24.1 (RCH<sub>2</sub>CH<sub>2</sub>CH<sub>2</sub>P<sup>+</sup>), 23.4 (RCH<sub>2</sub>P<sup>+</sup>), 22.6 (CH<sub>3</sub>- CH<sub>2</sub>R), 21.8 (RCH<sub>2</sub>-CH<sub>2</sub>-P<sup>+</sup>), 14.1 (CH<sub>3</sub>R), 9.4 and 8.6 (P<sup>+</sup>(CH<sub>3</sub>)<sub>3</sub>). FT-IR (ν(cm<sup>-1</sup>)): 2912, 2848, 1472, 981, 716. Elemental analysis: C (%): 59.96; found: 60.06, H (%): 11.16; found: 11.00.

### **Octadecyltrimethylphosphonium bromide (18ATMP·Br)**

TMP and 1.9 mL of 1-bromooctadecane gave after 20 h stirring 1.45 g (70%) of the product as a white powder. The chemical structure was ascertained by  $^1\text{H}$  NMR,  $^{13}\text{C}$  NMR, FT-IR and elemental analysis.  $^1\text{H}$  NMR (300.1 MHz;  $\text{CDCl}_3$ ;  $\delta$ (ppm)): 2.47 (2H, m,  $\text{RCH}_2\text{P}^+$ ), 2.25 and 2.20 (9H, d,  $\text{P}^+(\text{CH}_3)_3$ ), 1.50 (4H, m,  $\text{RCH}_2\text{CH}_2\text{CH}_2\text{P}^+$ ), 1.26 (28H, m,  $\text{CH}_3-(\text{CH}_2)_{14}-\text{CH}_2\text{CH}_2\text{P}^+$ ), 0.88 (3H, t,  $\text{CH}_3-(\text{CH}_2)_{15}-\text{P}^+$ ),  $^{13}\text{C}$  NMR (75.5 MHz;  $\text{CDCl}_3$ ;  $\delta$ (ppm)): 31.9 ( $\text{CH}_3-\text{CH}_2-\text{CH}_2\text{R}$ ), 30.6 ( $\text{CH}_3-\text{CH}_2-\text{CH}_2-\text{CH}_2\text{R}$ ), 30.4-29.0 ( $\text{CH}_3-\text{CH}_2-\text{CH}_2-(\text{CH}_2)_{11}\text{R}$ ), 24.1 ( $\text{RCH}_2\text{CH}_2\text{CH}_2\text{P}^+$ ), 23.4 ( $\text{RCH}_2\text{P}^+$ ), 22.6 ( $\text{CH}_3-\text{CH}_2\text{R}$ ), 21.8 ( $\text{RCH}_2-\text{CH}_2-\text{P}^+$ ), 14.1 ( $\text{CH}_3\text{R}$ ), 9.4 and 8.6 ( $\text{P}^+(\text{CH}_3)_3$ ). FT-IR ( $\nu$ ( $\text{cm}^{-1}$ )): 2915, 2849, 1472, 991, 714. Elemental analysis: C (%): 61.73; found: 61.56, H (%): 11.38; found: 11.22.

### **Eicosyltrimethylphosphonium bromide (20ATMP·Br)**

TMP and 2.0 g of 1-bromoeicosane gave after 22 h stirring 1.7 g (80%) of the product as a white powder. The chemical structure was ascertained by  $^1\text{H}$  NMR,  $^{13}\text{C}$  NMR, FT-IR and elemental analysis.  $^1\text{H}$  NMR (300.1 MHz;  $\text{CDCl}_3$ ;  $\delta$ (ppm)): 2.47 (2H, m,  $\text{RCH}_2\text{P}^+$ ), 2.25 and 2.20 (9H, d,  $\text{P}^+(\text{CH}_3)_3$ ), 1.50 (4H, m,  $\text{RCH}_2\text{CH}_2\text{CH}_2\text{P}^+$ ), 1.26 (32H, m,  $\text{CH}_3-(\text{CH}_2)_{16}-\text{CH}_2\text{CH}_2\text{P}^+$ ), 0.88 (3H, t,  $\text{CH}_3-(\text{CH}_2)_{15}-\text{P}^+$ ),  $^{13}\text{C}$  NMR (75.5 MHz;  $\text{CDCl}_3$ ;  $\delta$ (ppm)): 31.9 ( $\text{CH}_3-\text{CH}_2-\text{CH}_2\text{R}$ ), 30.6 ( $\text{CH}_3-\text{CH}_2-\text{CH}_2-\text{CH}_2\text{R}$ ), 30.4-29.0 ( $\text{CH}_3-\text{CH}_2-\text{CH}_2-(\text{CH}_2)_{13}\text{R}$ ), 24.1 ( $\text{RCH}_2\text{CH}_2\text{CH}_2\text{P}^+$ ), 23.4 ( $\text{RCH}_2\text{P}^+$ ), 22.6 ( $\text{CH}_3-\text{CH}_2\text{R}$ ), 21.8 ( $\text{RCH}_2-\text{CH}_2-\text{P}^+$ ), 14.1 ( $\text{CH}_3\text{R}$ ), 9.4 and 8.6 ( $\text{P}^+(\text{CH}_3)_3$ ). FT-IR ( $\nu$ ( $\text{cm}^{-1}$ )): 2915, 2848, 1478, 986, 711. Elemental analysis: C (%): 63.26; found: 63.12, H (%): 11.58; found: 11.37.

### **Docosyltrimethylphosphonium bromide (22ATMP·Br)**

TMP and 2.1 g of 1-bromodocosane gave after 24 h stirring 1.6 g (70%) of the product as a white powder. The chemical structure was ascertained by  $^1\text{H}$  NMR,  $^{13}\text{C}$  NMR, FT-IR and elemental analysis.  $^1\text{H}$  NMR (300.1 MHz;  $\text{CDCl}_3$ ;  $\delta$ (ppm)): 2.47 (2H, m,  $\text{RCH}_2\text{P}^+$ ), 2.25 and 2.20 (9H, d,  $\text{P}^+(\text{CH}_3)_3$ ), 1.50 (4H, m,  $\text{RCH}_2\text{CH}_2\text{CH}_2\text{P}^+$ ), 1.26 (36H, m,  $\text{CH}_3-(\text{CH}_2)_{18}-\text{CH}_2\text{CH}_2\text{P}^+$ ), 0.88 (3H, t,  $\text{CH}_3-(\text{CH}_2)_{15}-\text{P}^+$ ),  $^{13}\text{C}$  NMR (75.5 MHz;  $\text{CDCl}_3$ ;  $\delta$ (ppm)): 31.9 ( $\text{CH}_3-\text{CH}_2-\text{CH}_2\text{R}$ ), 30.6 ( $\text{CH}_3-\text{CH}_2-\text{CH}_2-\text{CH}_2\text{R}$ ), 30.4-29.0 ( $\text{CH}_3-\text{CH}_2-\text{CH}_2-(\text{CH}_2)_{15}\text{R}$ ), 24.1 ( $\text{RCH}_2\text{CH}_2\text{CH}_2\text{P}^+$ ), 23.4 ( $\text{RCH}_2\text{P}^+$ ), 22.6 ( $\text{CH}_3-\text{CH}_2\text{R}$ ), 21.8 ( $\text{RCH}_2-\text{CH}_2-\text{P}^+$ ), 14.1 ( $\text{CH}_3\text{R}$ ), 9.4 and 8.6 ( $\text{P}^+(\text{CH}_3)_3$ ). FT-IR ( $\nu$ ( $\text{cm}^{-1}$ )): 2911, 2848, 1474, 989, 716. Elemental analysis: C (%): 64.61; found: 64.70, H (%): 11.75; found: 11.65.

## 2. Methodology used for the single-crystal analysis

A crystal of 12ATMP·Br was mounted on a D8 Venture diffractometer, the radiation used was from a microfocus with a multilayer monochromator with Mo-K $\alpha$  radiation ( $\lambda = 0.071073$  nm), and the diffraction was collected with an area detector Photon 100 CMOS. The unit cell parameters were determined from 7111 reflections ( $2.23^\circ < \theta < 25.14^\circ$ ) and refined by least-squares method. Intensities of 25175 reflections ( $2.23^\circ < \theta < 25.39^\circ$ ) were collected, 3385 of which were unique ( $R_{\text{int}} = 0.0429$ ), and 2530 unique reflections were considered as observed (conditions  $I > 2\sigma(I)$ ). Lorentz-polarization and absorption corrections were made.

The structure was solved by direct methods (SHELXS program) and refined by full-matrix least-squared method (SHELXL-2014 program; G.M. Sheldrick, Acta Cryst. 2015, C71, 3-8).

The minimized function was  $\sum w \left| |F_o|^2 - |F_c|^2 \right|^2$  where

$$w = [\sigma^2(F_o^2) + (0.0390P)^2 + 0.4830P]^{-1} \quad P = (F_o^2 + 2F_c^2)/3.$$

All H atoms were added with idealized geometry and all C-H bond lengths were refined with the constraint that all C-H distances in a group were equal. For all CH<sub>2</sub> (and CH<sub>3</sub>) groups, the H isotropic temperature factor has been calculated equal to 1.2 (and 1.5) times the equivalent temperature factor of the atom to which they are linked. The final *R* factors are shown in Table SI-1 together with other details of the quality of the molecule structure.

# Figures

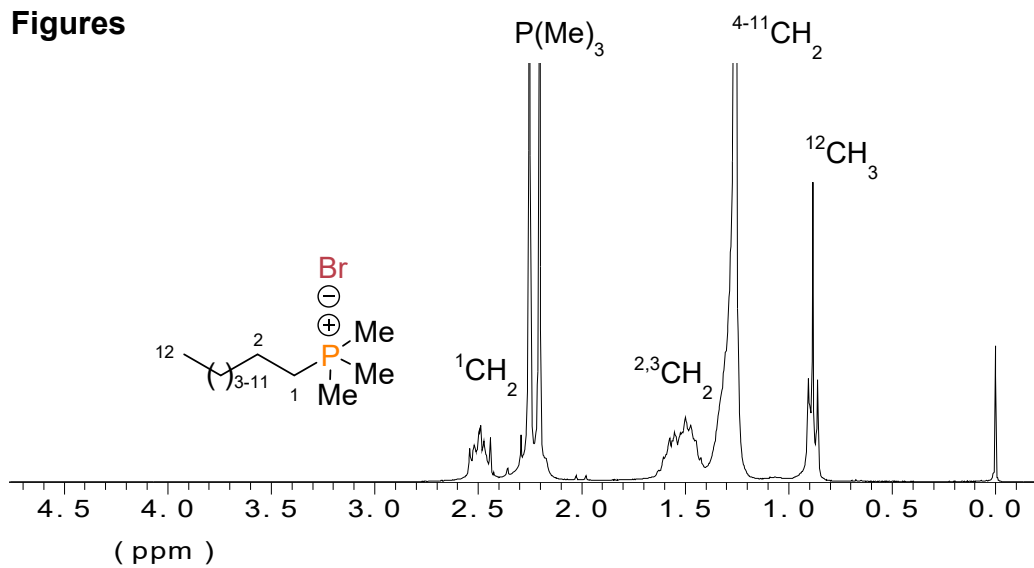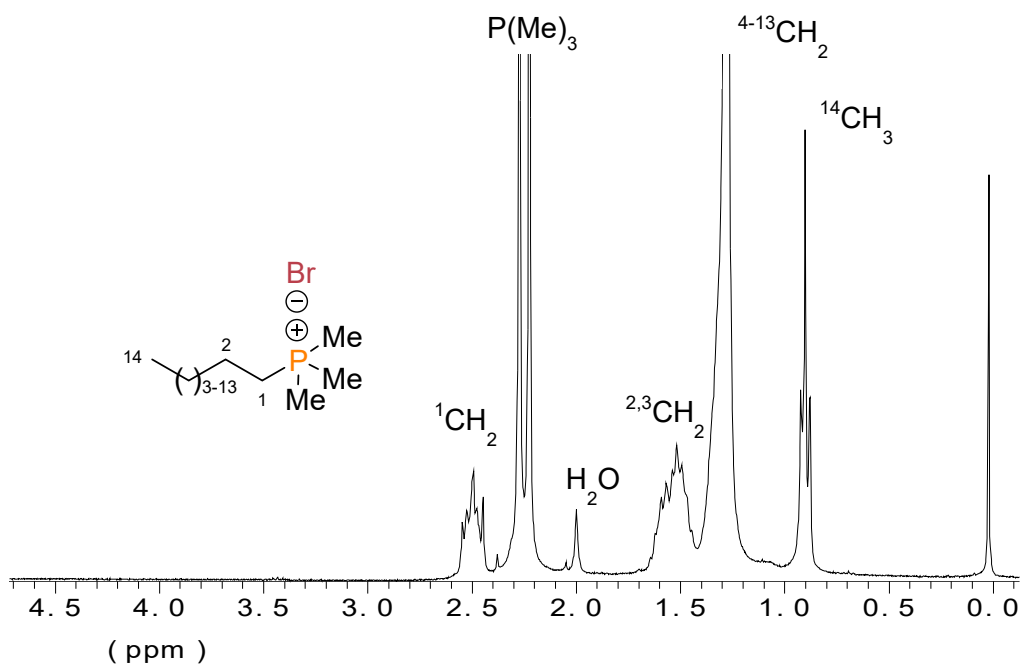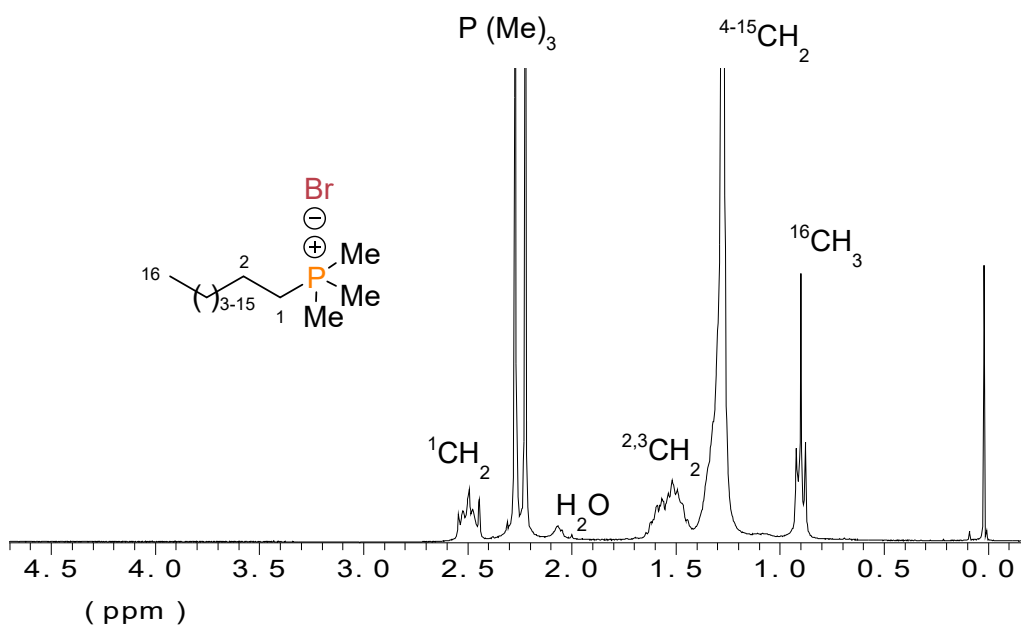

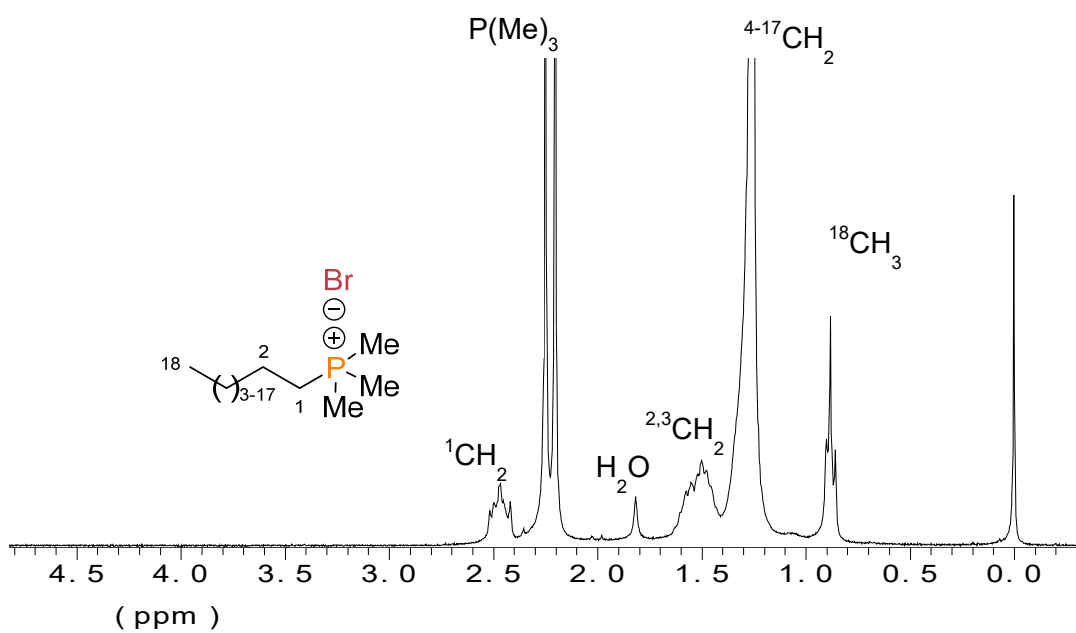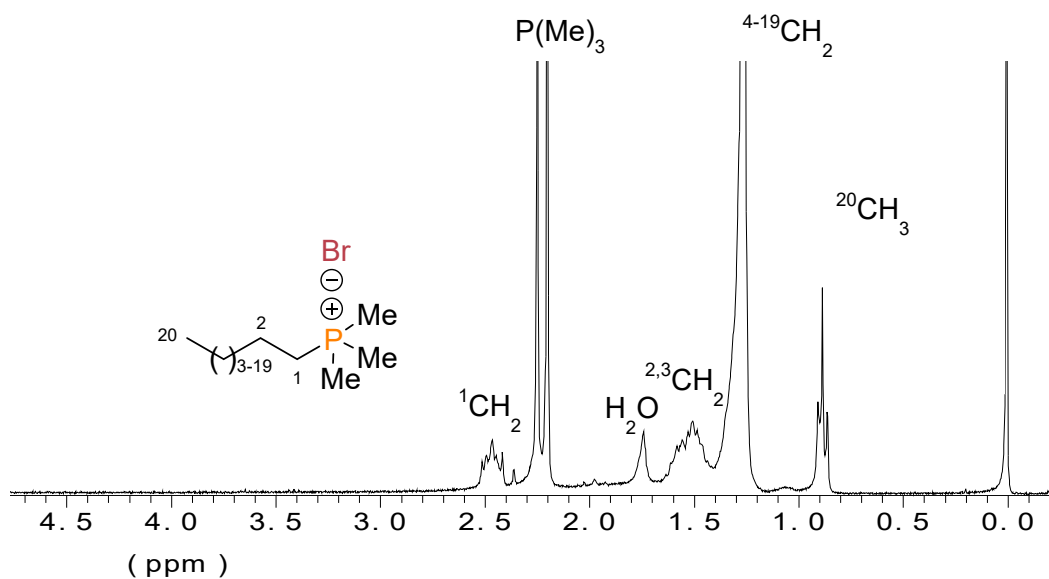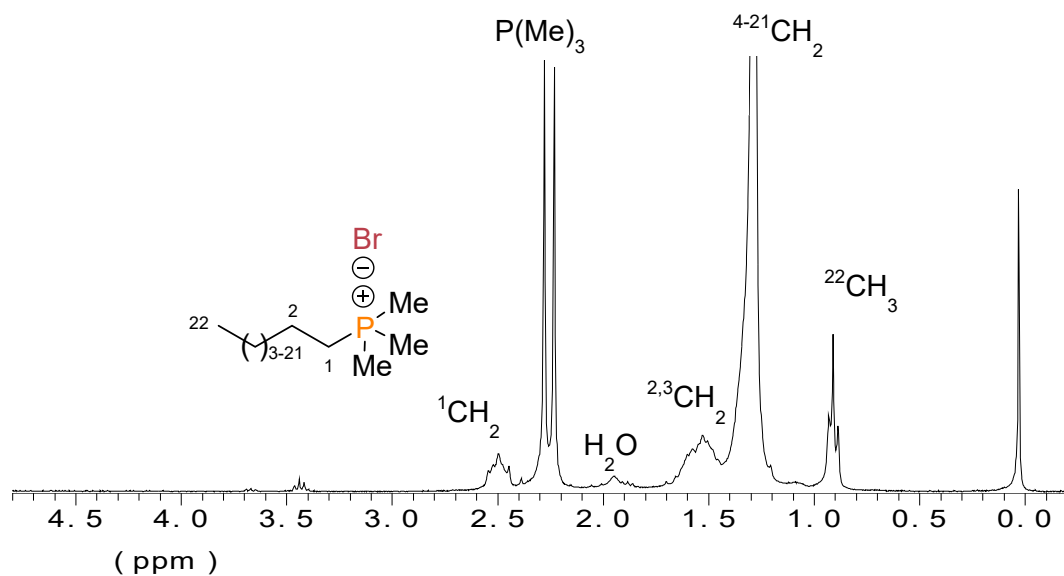

**Fig. SI-1.**  $^1\text{H}$  NMR spectra of  $n\text{ATMP}\cdot\text{Br}$  surfactants.

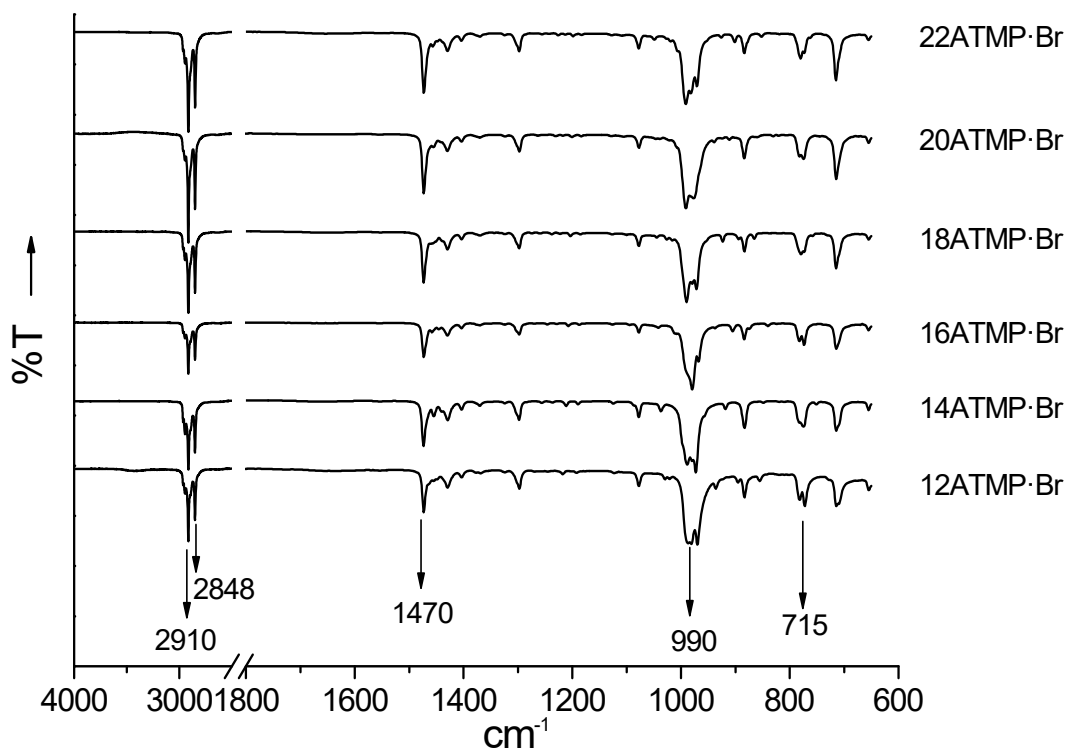

**Fig. SI-2.** Comparison of FT-IR spectra of  $n$ ATMP·Br surfactants.

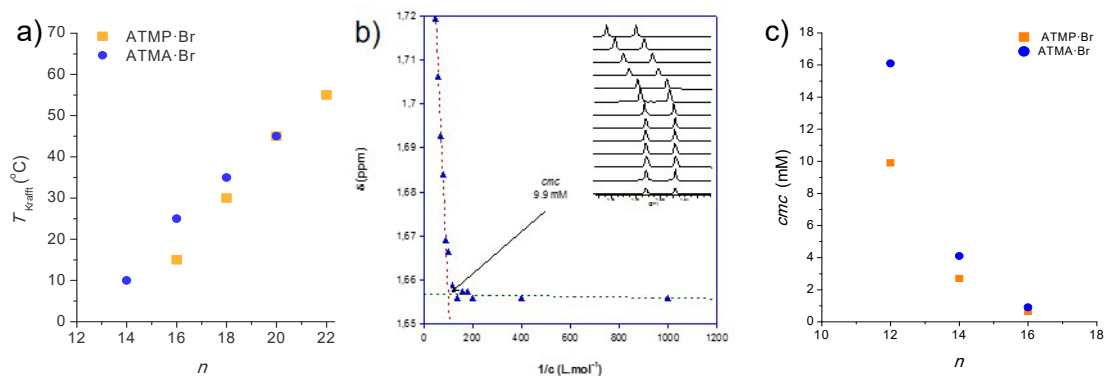

**Fig. SI-3.** Comparison of the above 0 °C Krafft temperatures for  $n$ ATMP·Br and  $n$ ATMA·Br surfactants (a), plot of the methyl chemical shift of 12ATMP·Br against concentration at 25 °C with indication of the  $cmc$ ; inset: the evolution of the  $^1\text{H}$  NMR methyl signal of 12ATMP·Br with concentration (b) and comparison of the  $cmc$  determined by  $^1\text{H}$  NMR for  $n$ ATMP·Br and  $n$ ATMA·Br with  $n=12, 14$  and  $16$  (c).



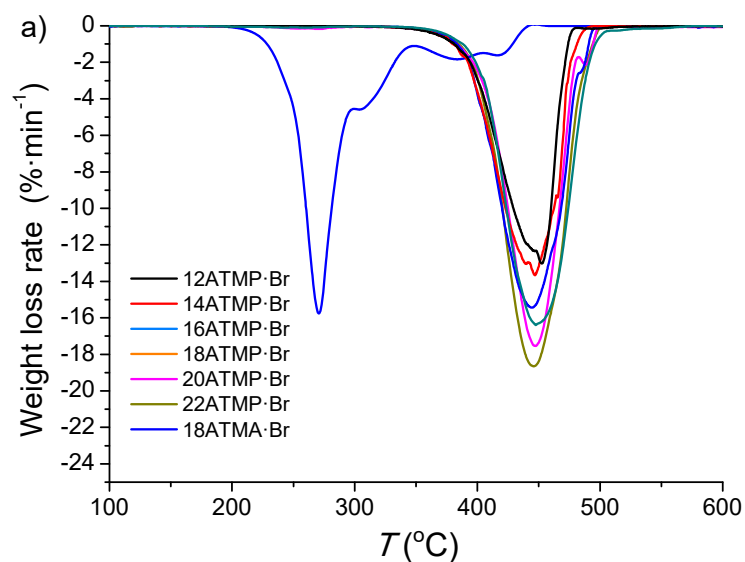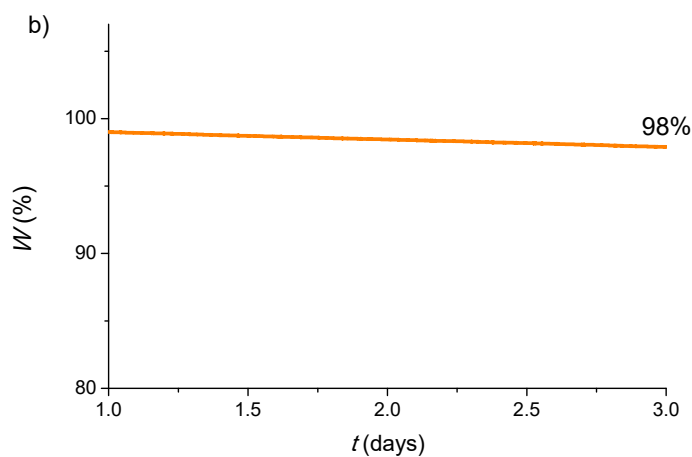

**Fig. SI-4.** TGA derivative curves of  $n$ ATMP·Br surfactants (a). Isothermal essay realized with 18ATMP·Br at 280 °C (b).

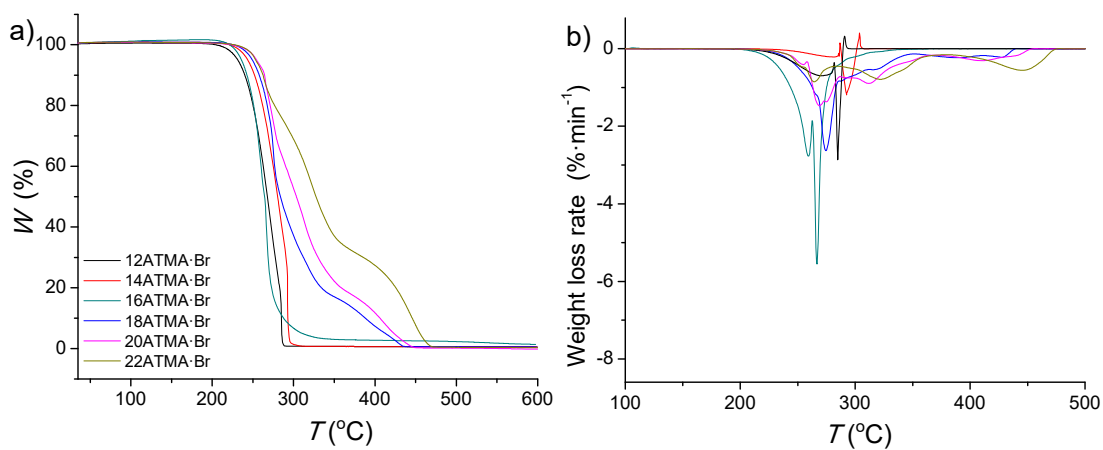

**Fig. SI-5.** TGA traces of  $n$ ATMA·Br recorded under a nitrogen atmosphere (a) and their corresponding derivative curves (b).

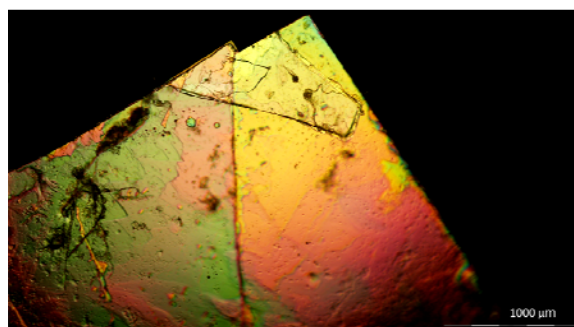

**Fig. SI-6.** Optical micrograph recorded from the single-crystal of 12ATMP·Br which was obtained by vapor diffusion technique and used for XRD analysis.

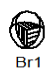

**Fig. SI-7.** ORTEP representation of the 12ATMP·Br molecule in the conformation adopted in the crystal with atom labelling indication. The displacement ellipsoids are drawn at 50% probability levels and H atoms are drawn as small empty circles of arbitrary radius.

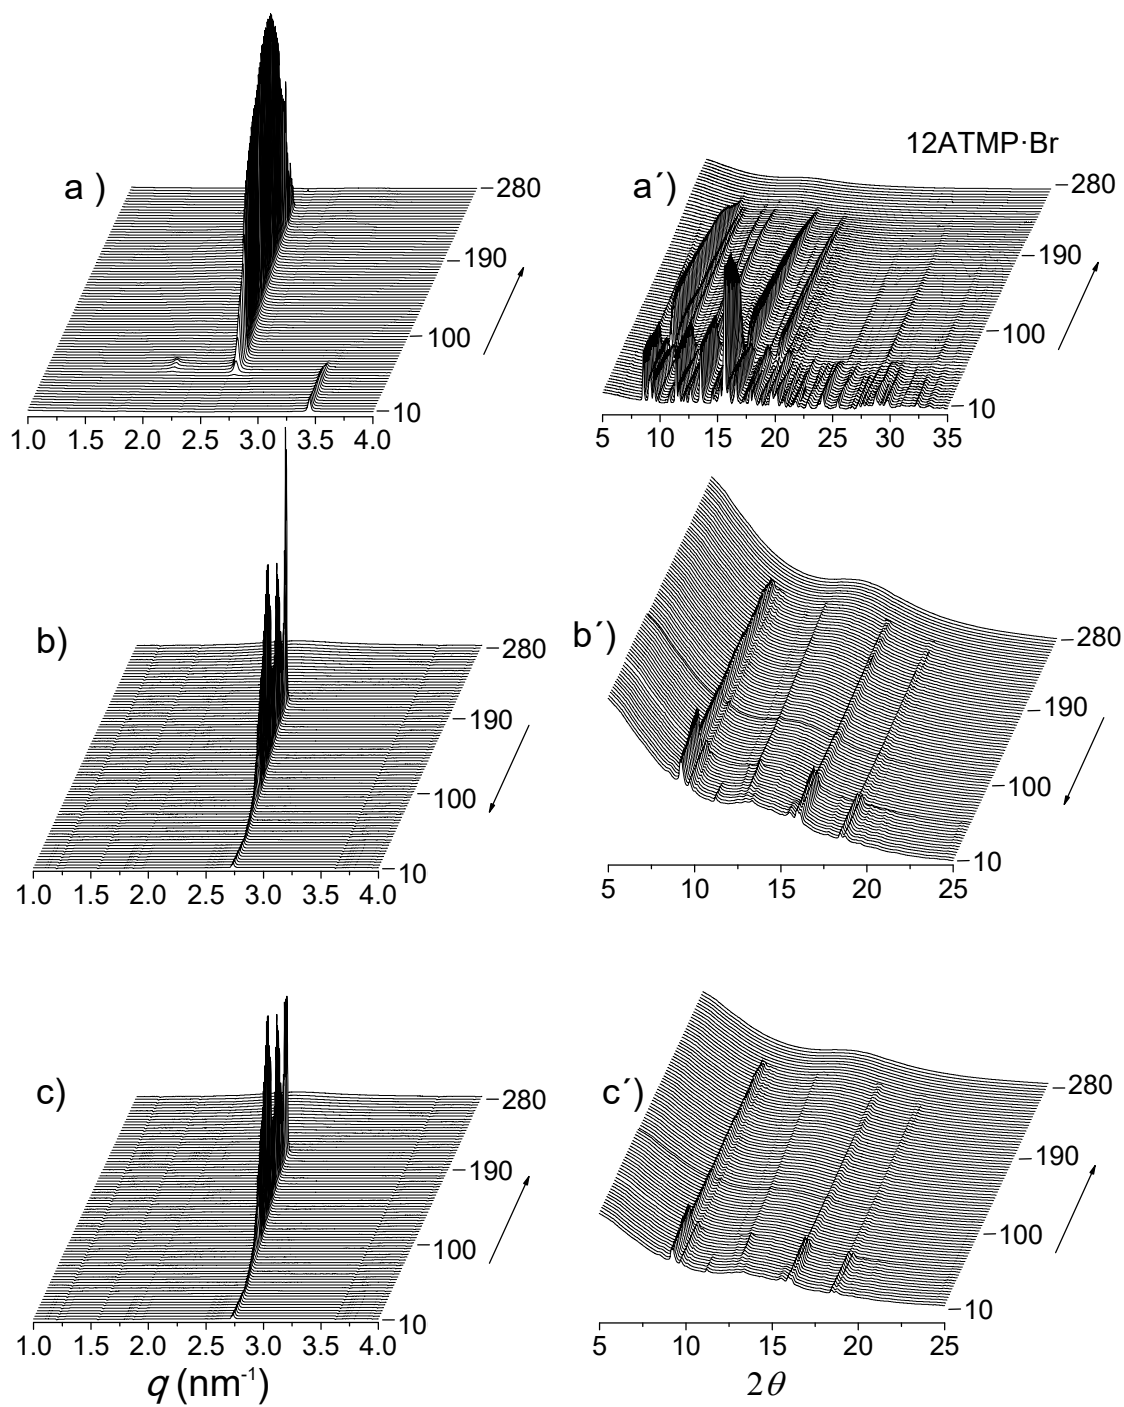

**Fig. SI-8.** SAXS (left) and WAXS (right) plots from 12ATMP·Br registered over the 10-280 °C interval. a) heating, b) cooling and c) reheating.

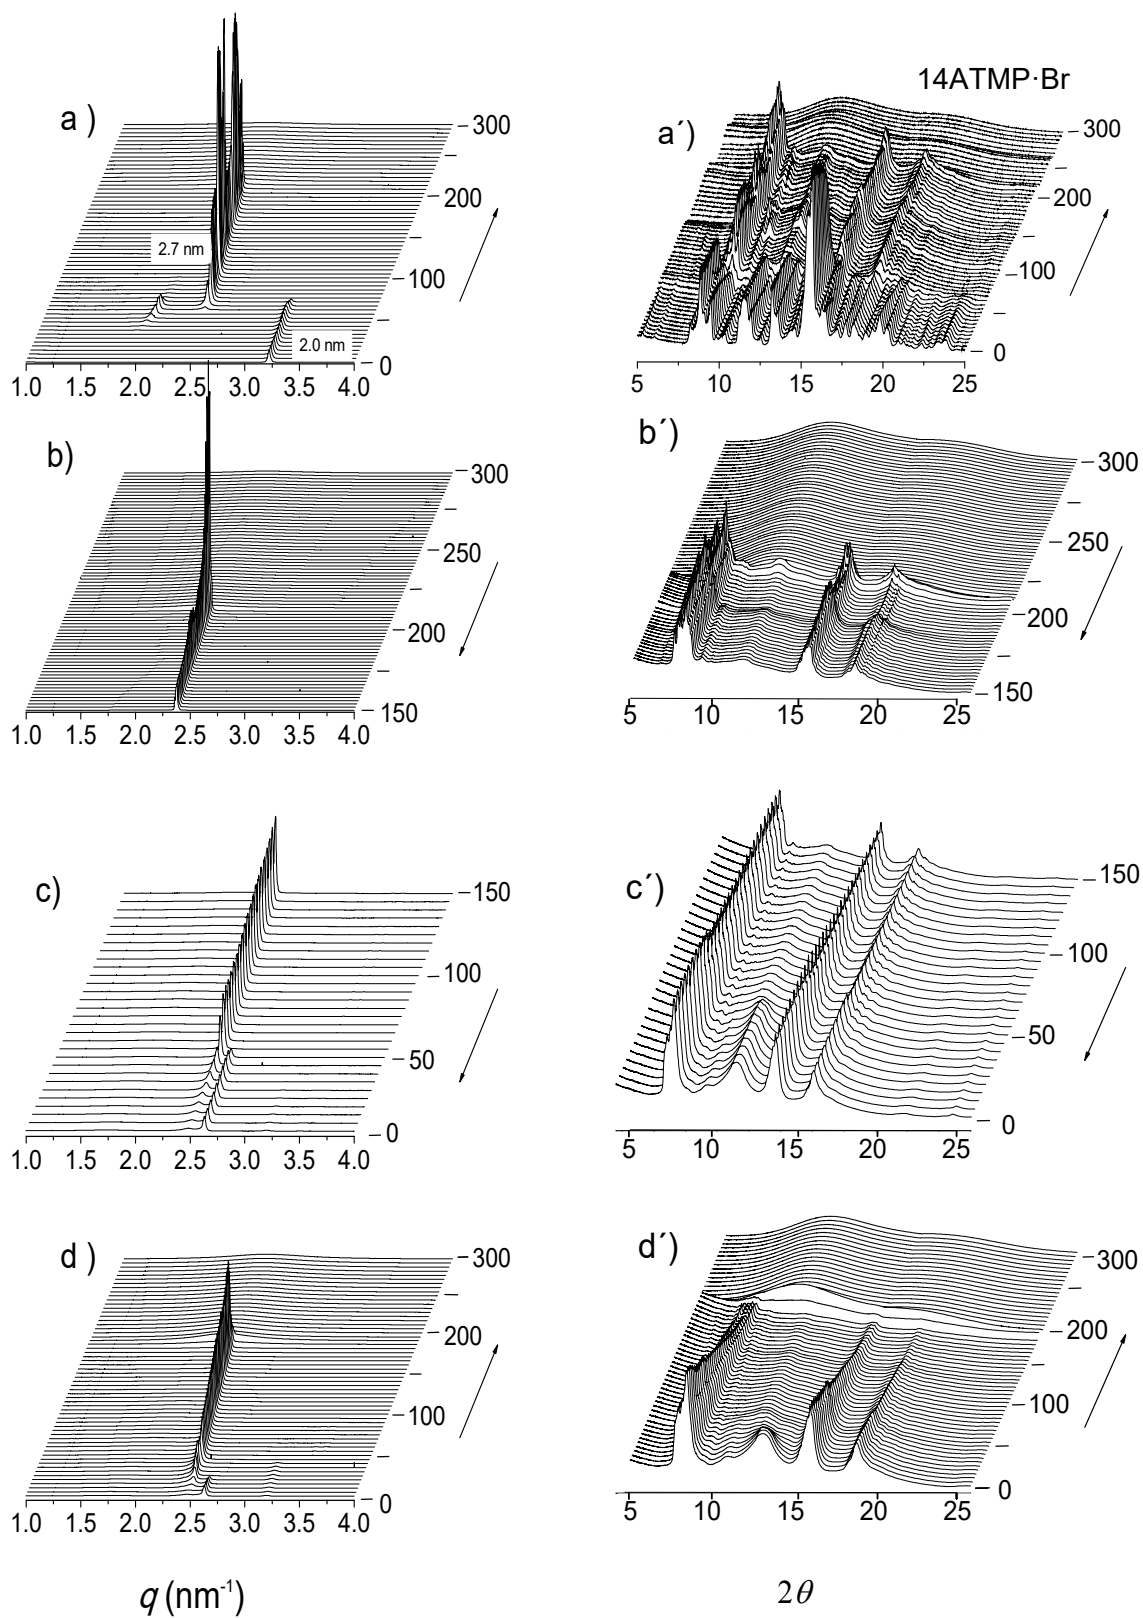

**Fig. SI-9.** SAXS (left) and WAXS (right) plots from 14ATMP·Br registered over the 0-300 °C interval. a) heating, b) slow cooling, c) fast cooling and d) reheating.

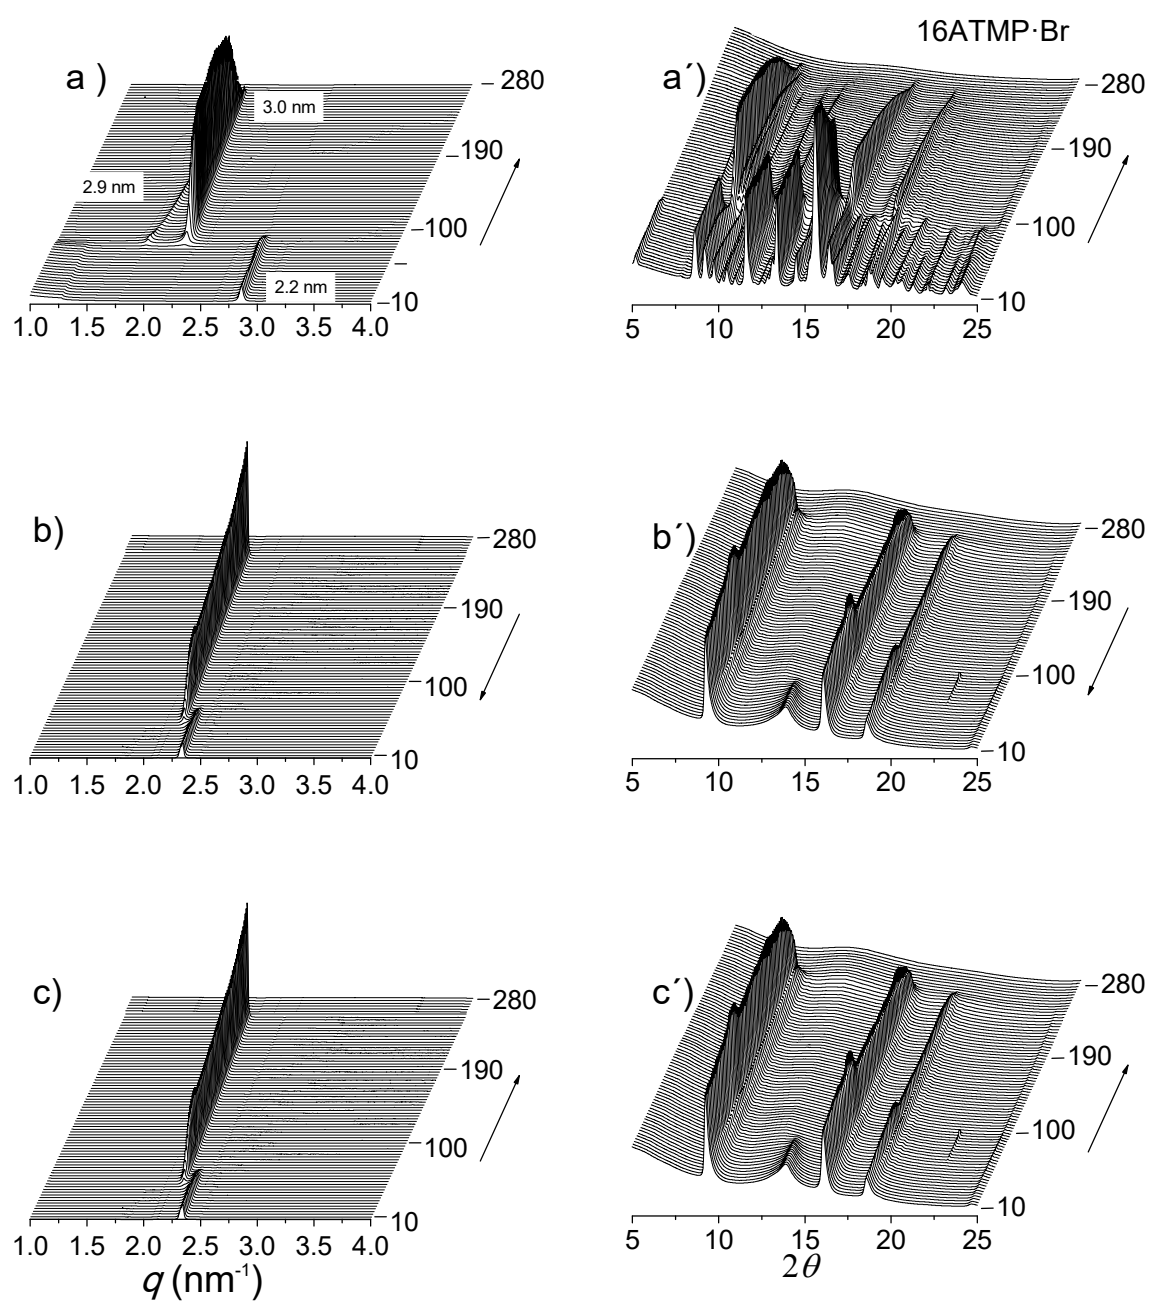

**Fig. SI-10.** SAXS (left) and WAXS (right) plots from 16ATMP·Br registered over the 10-280 °C interval. a) heating, b) cooling and c) reheating.

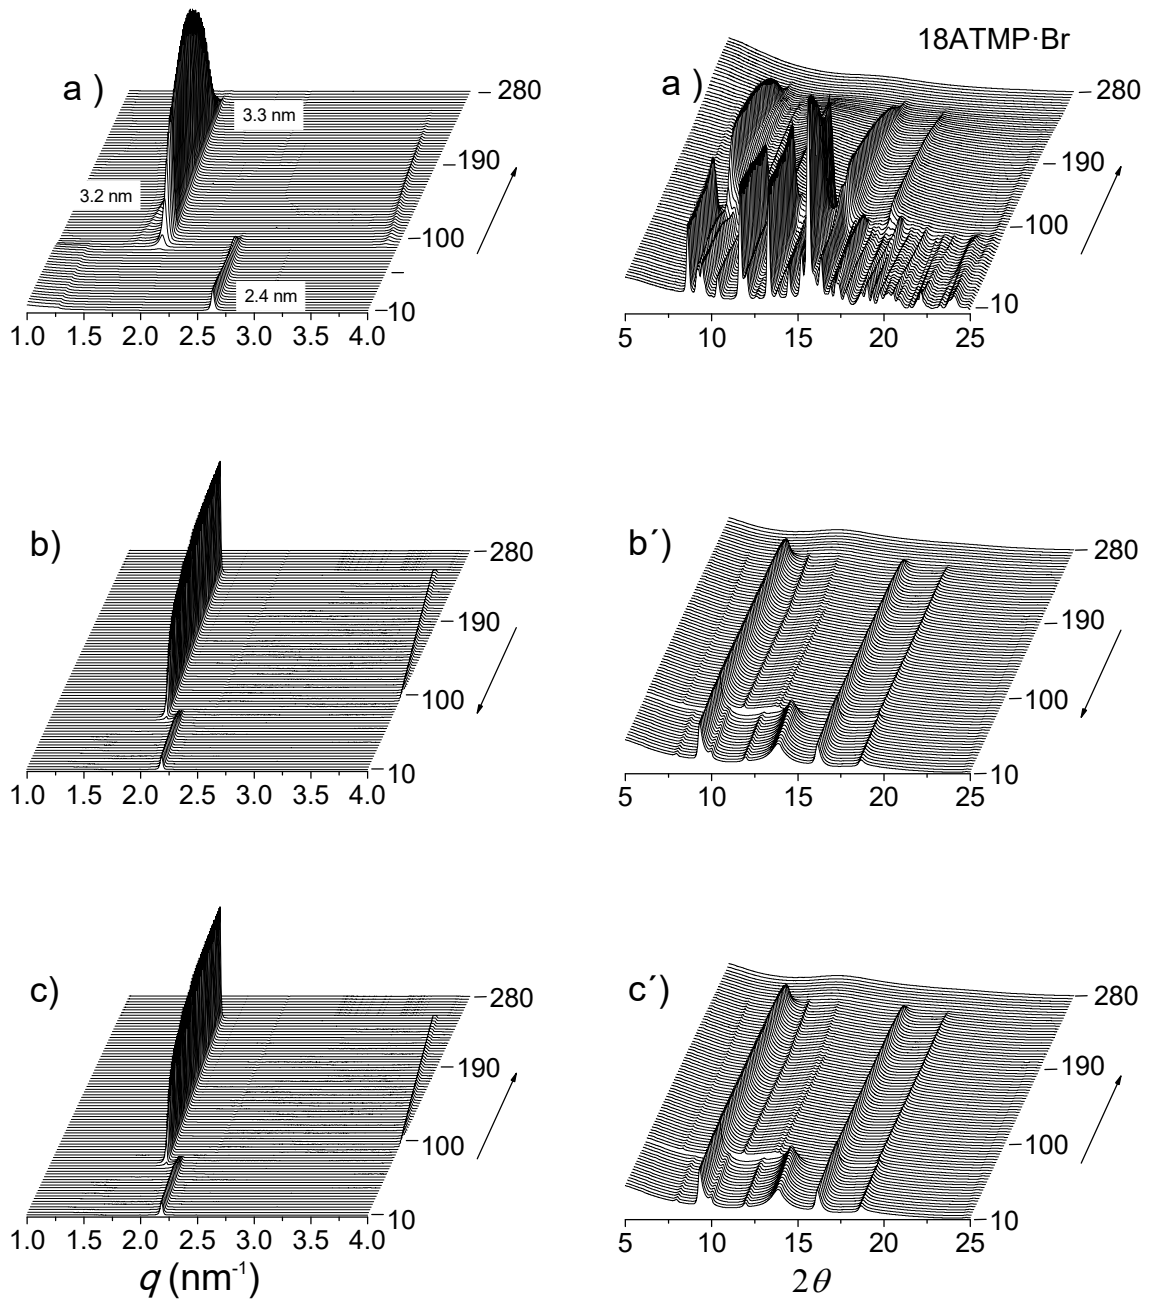

**Fig. SI-11.** SAXS (left) and WAXS (right) plots from 18ATMP·Br registered over the 10-280 °C interval. a) heating, b) cooling and c) reheating.

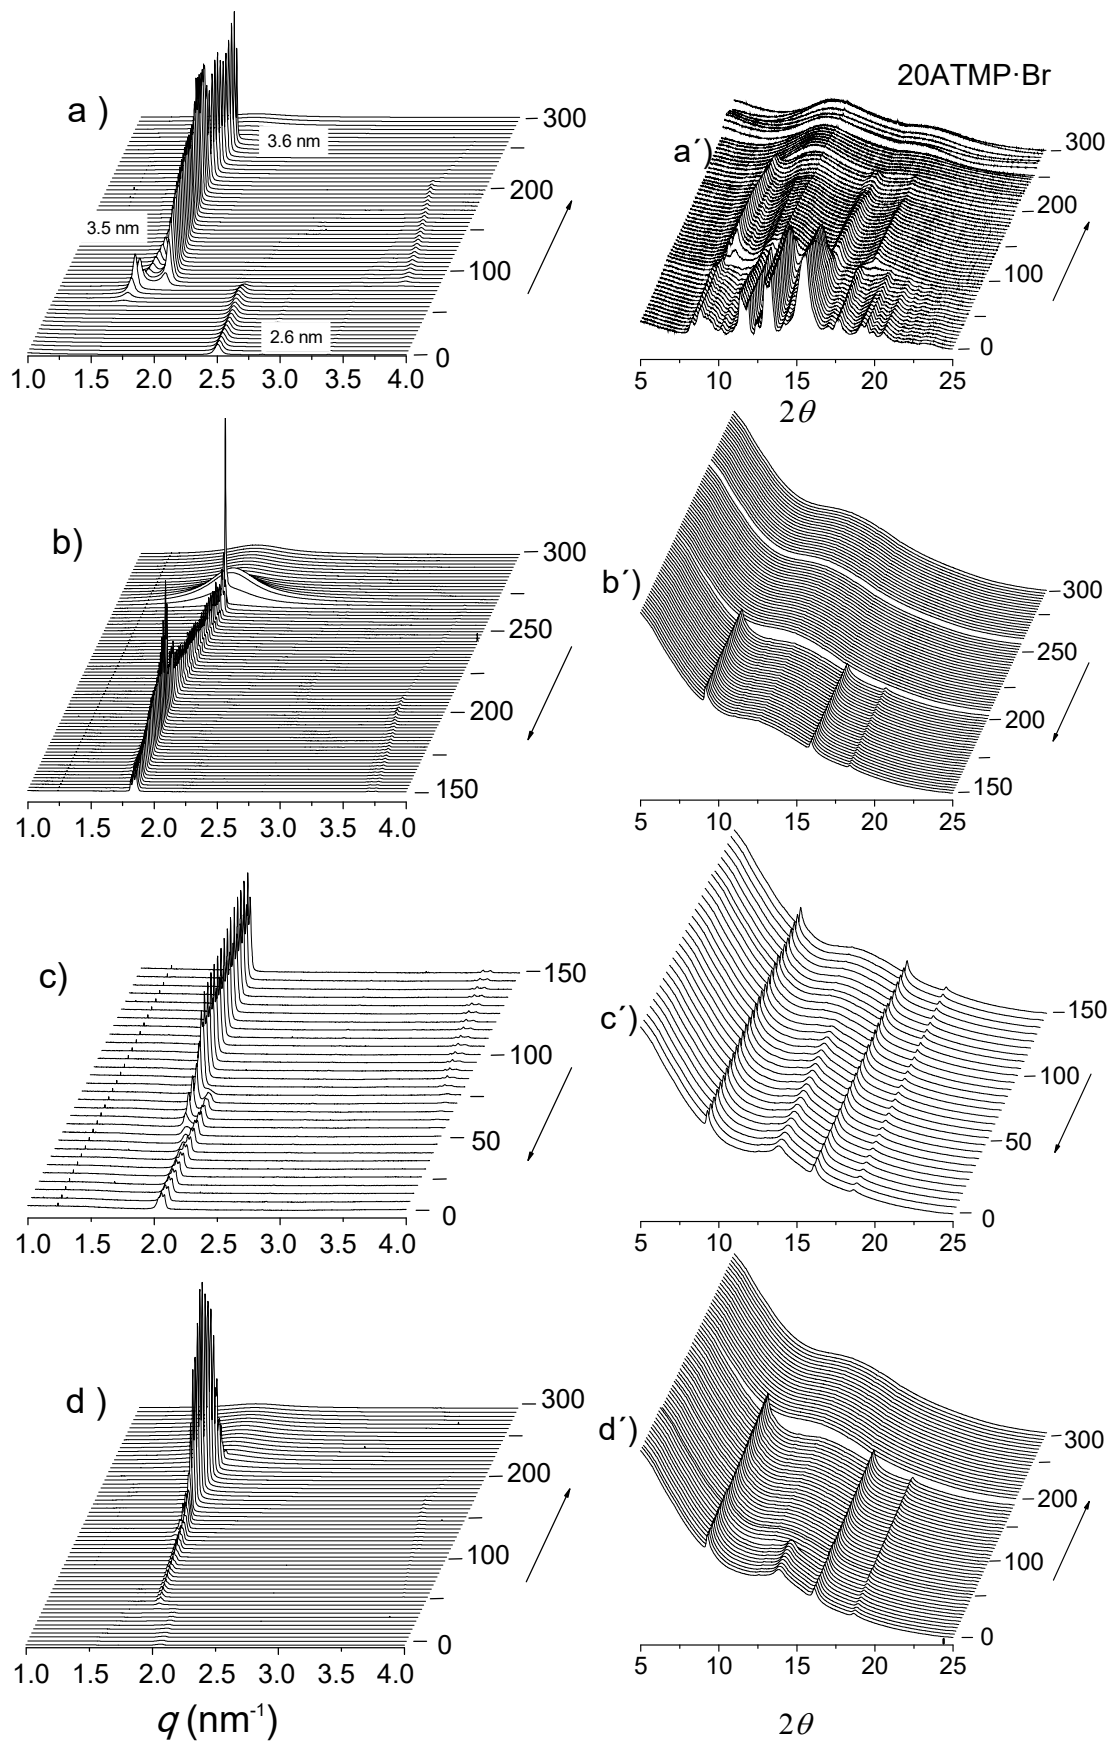

**Fig. SI-12.** SAXS (left) and WAXS (right) plots from 20ATMP·Br registered over the 0-300 °C interval. a) heating, b) slow cooling, c) fast cooling and d) reheating.

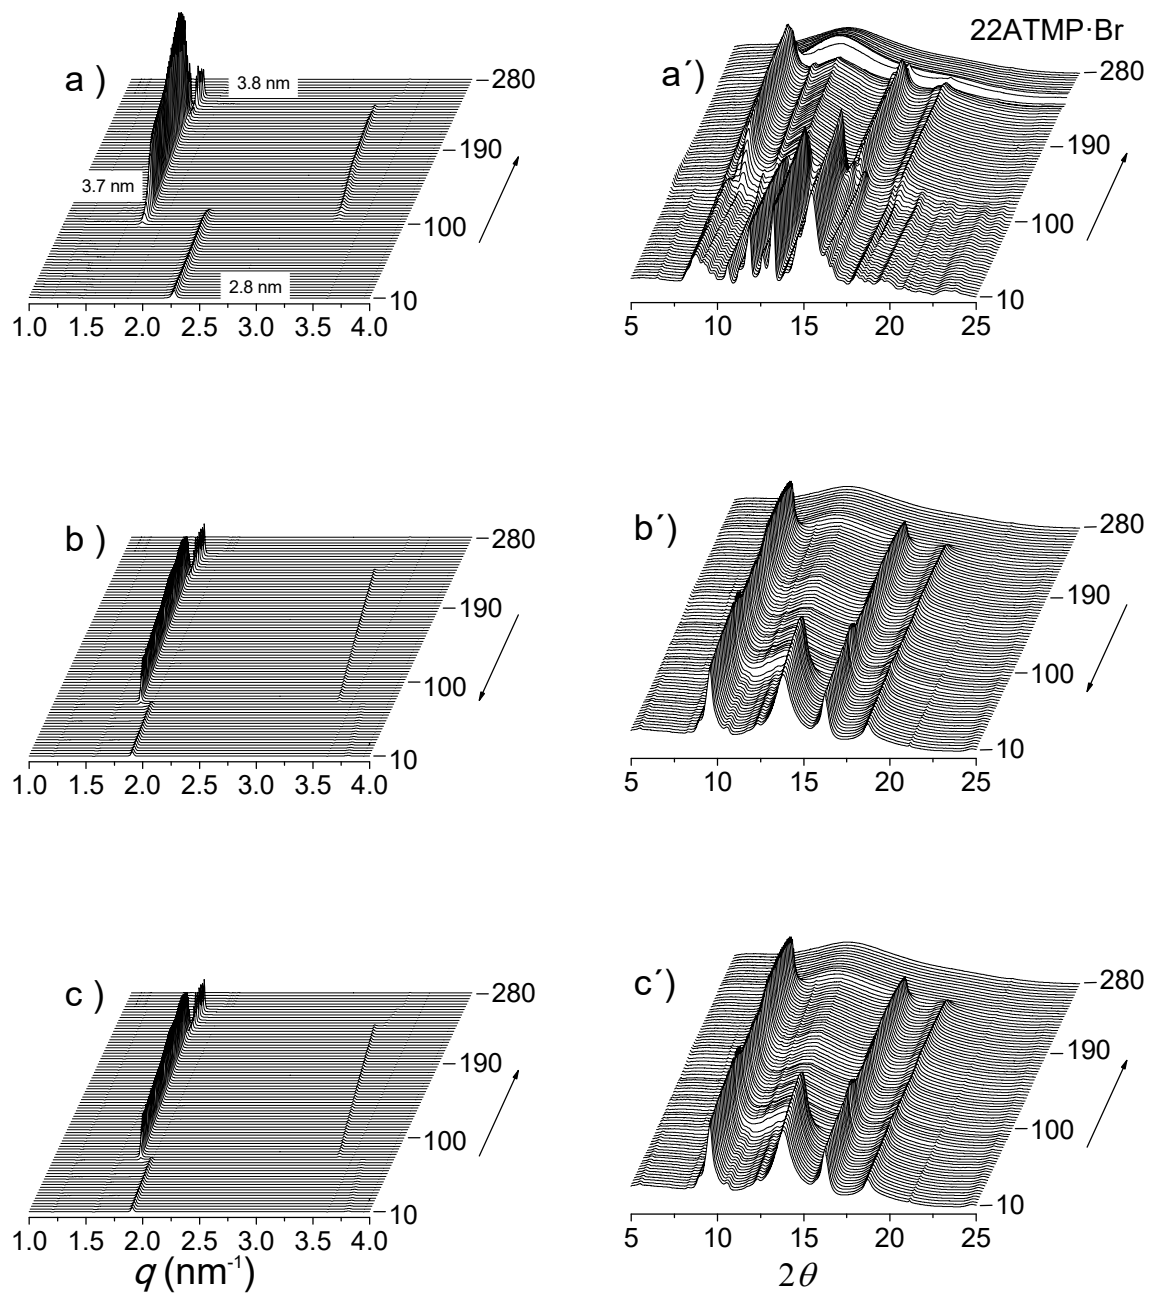

**Fig. SI-13.** SAXS (left) and WAXS (right) plots from 22ATMP·Br registered over the 10-280 °C interval. a) heating, b) cooling and c) reheating.



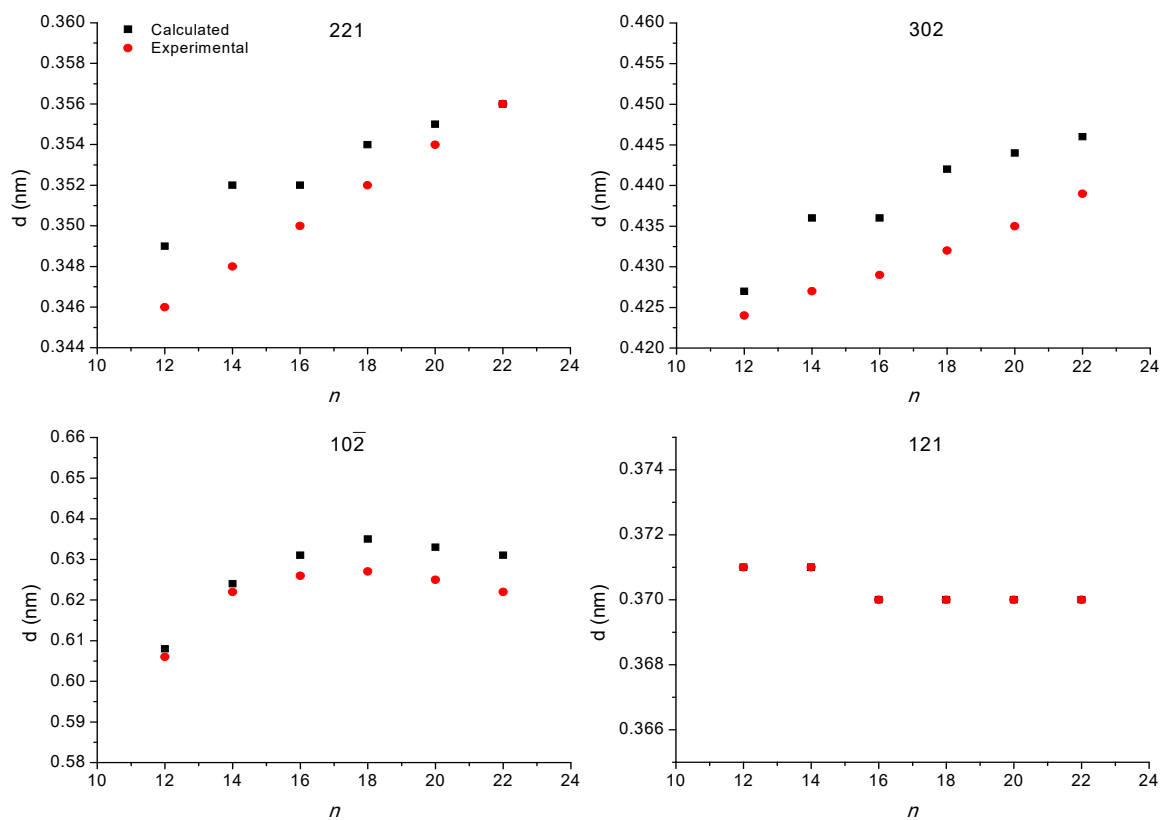

**Fig. SI-14.** Graphical comparison of the observed (at 25 °C) and calculated main  $d$ -spacings (nm) with  $h \neq 0$  for  $n$ ATMP·Br.

12ATMP·Br

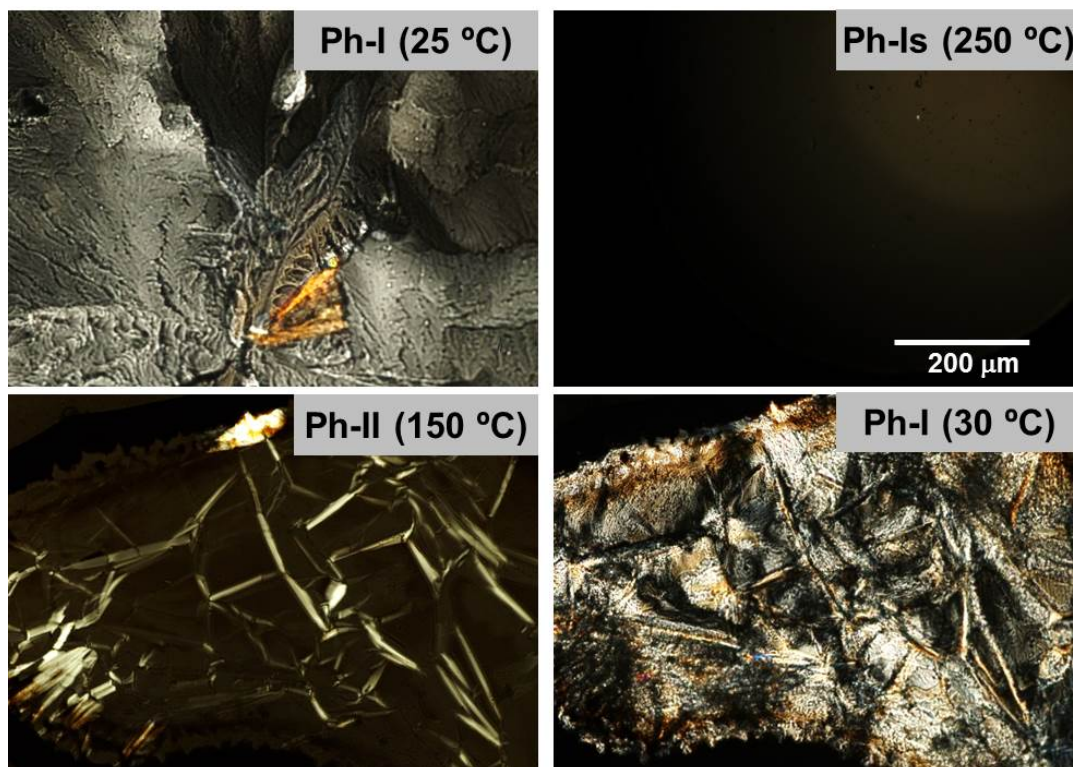

16ATMP·Br

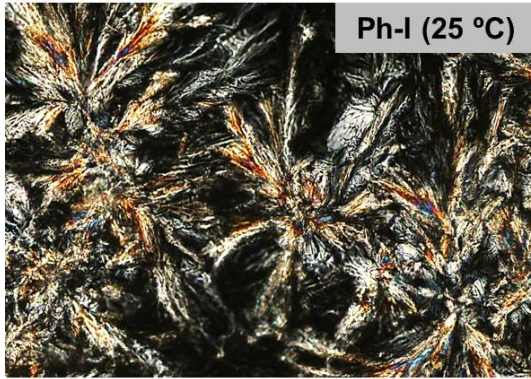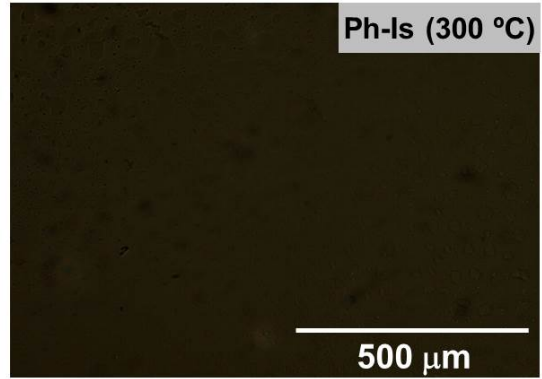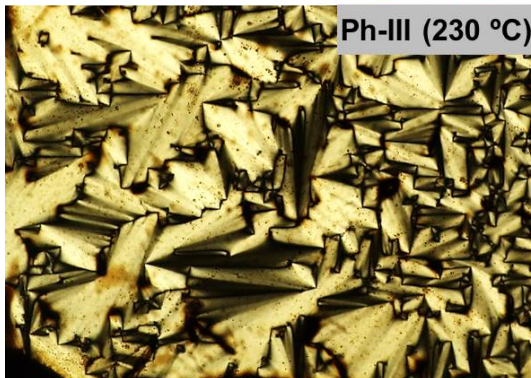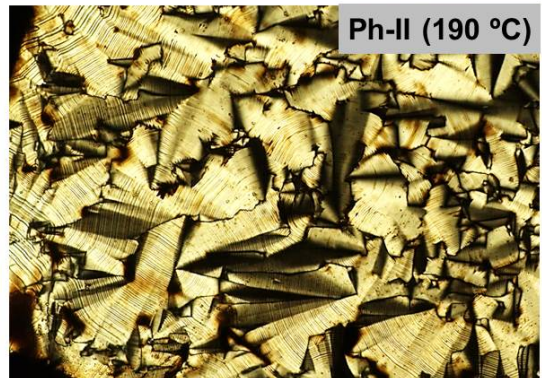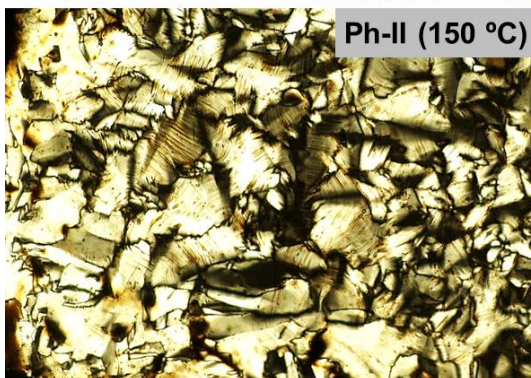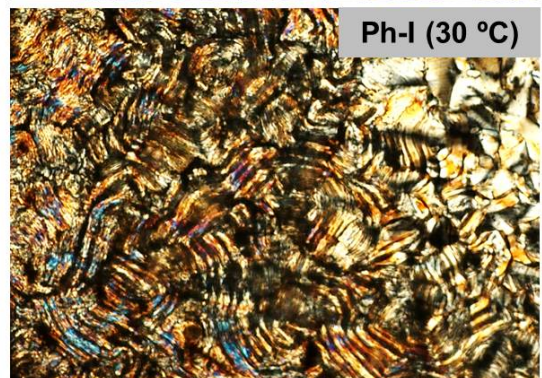

18ATMP·Br

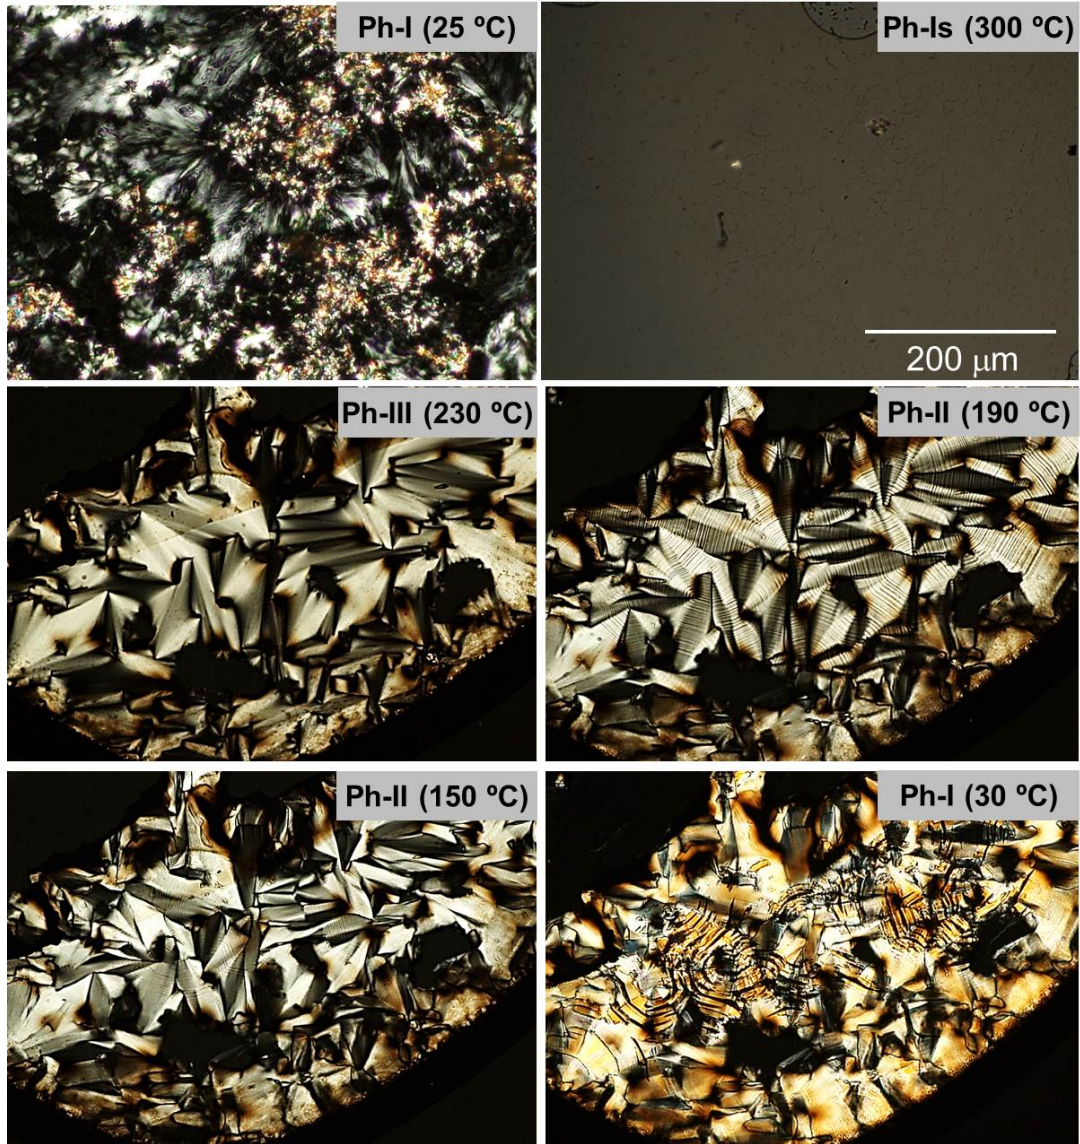

22ATMP·Br

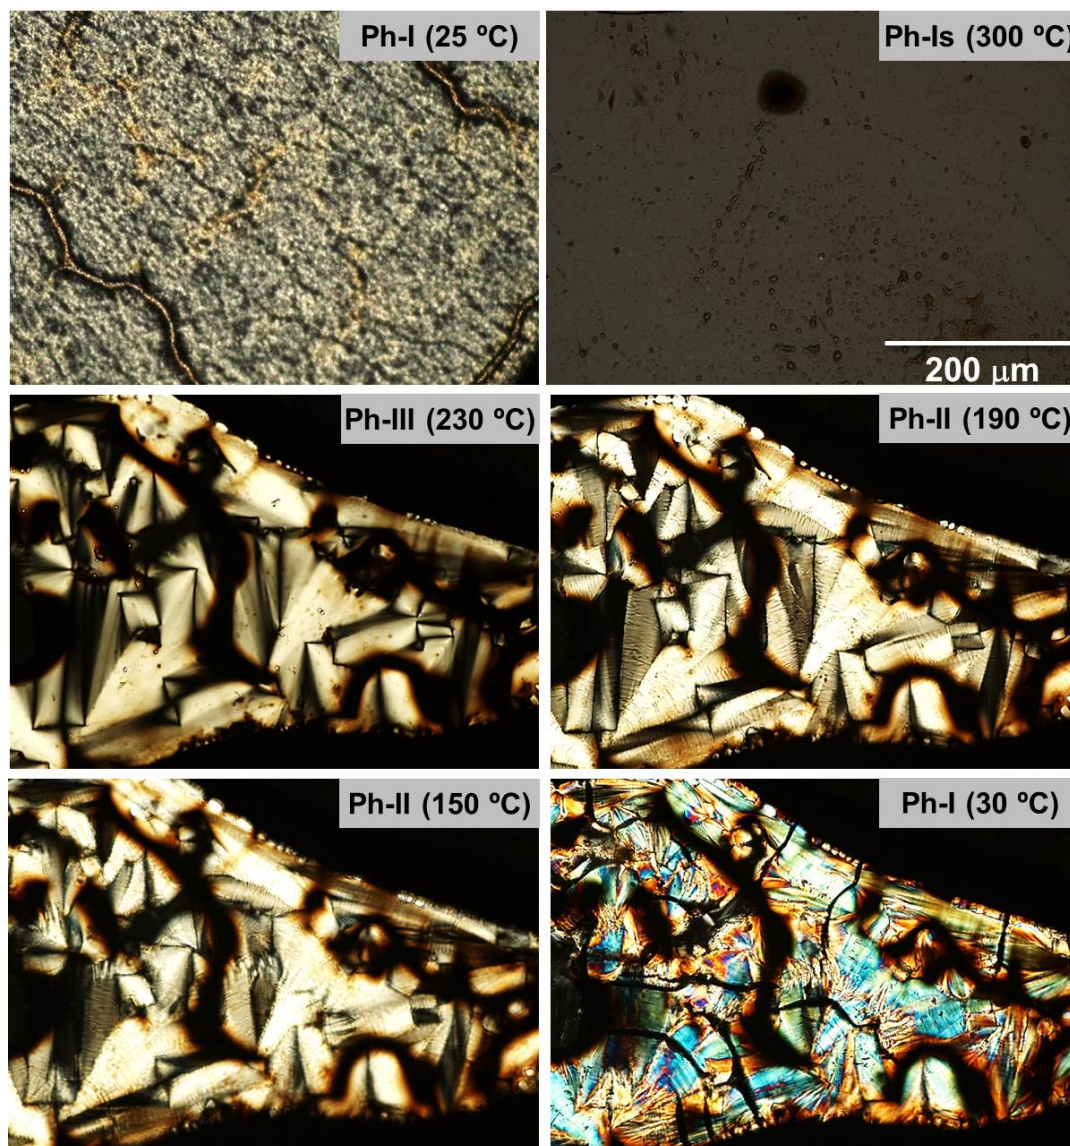

Fig. SI-15. POM micrographs recorded from *n*ATMP·Br at the indicated temperatures.

## Tables

**Table SI-1.** Crystal data and structure refinement for 12ATMP·Br.

|                                   |                                                                                                                 |
|-----------------------------------|-----------------------------------------------------------------------------------------------------------------|
| Empirical formula                 | C <sub>15</sub> H <sub>34</sub> Br P                                                                            |
| Formula weight                    | 325.30                                                                                                          |
| Temperature                       | 293(2) K                                                                                                        |
| Wavelength                        | 0.071073 nm                                                                                                     |
| Crystal system, space group       | Monoclinic, P 2 <sub>1</sub> /c                                                                                 |
| Unit cell dimensions              | a = 1.82906(10) nm    alpha = 90°<br>b = 0.79655(4) nm    beta = 93.119(2)°<br>c = 1.26721(7) nm    gamma = 90° |
| Volume                            | 1843.51(17) Å <sup>3</sup>                                                                                      |
| Z, Calculated density             | 4, 1.172 Mg/m <sup>3</sup>                                                                                      |
| Absorption coefficient            | 2.301 mm <sup>-1</sup>                                                                                          |
| F(000)                            | 696                                                                                                             |
| Crystal size                      | 0.449 x 0.139 x 0.098 mm                                                                                        |
| Theta range for data collection   | 2.230 to 25.393°                                                                                                |
| Limiting indices                  | -22<=h<=22, -9<=k<=9, -15<=l<=15                                                                                |
| Reflections collected / unique    | 25175 / 3385 [R(int) = 0.0429]                                                                                  |
| Completeness to theta = 25.242    | 99.9 %                                                                                                          |
| Absorption correction             | Semi-empirical from equivalents                                                                                 |
| Max. and min. transmission        | 0.7452 and 0.6345                                                                                               |
| Refinement method                 | Full-matrix least-squares on F <sup>2</sup>                                                                     |
| Data / restraints / parameters    | 3385 / 0 / 169                                                                                                  |
| Goodness-of-fit on F <sup>2</sup> | 1.046                                                                                                           |
| Final R indices [I>2σ (I)]        | R1 = 0.0298, wR2 = 0.0720                                                                                       |
| R indices (all data)              | R1 = 0.0480, wR2 = 0.0814                                                                                       |
| Extinction coefficient            | n/a                                                                                                             |
| Largest diff. peak and hole       | 0.329 and -0.255 e.Å <sup>-3</sup>                                                                              |

**Table SI-2.** Atomic coordinates (x 10<sup>4</sup>) and equivalent isotropic displacement parameters (Å<sup>2</sup> x 10<sup>3</sup>) for 12ATMP·Br. U (eq) is defined as one third of the trace of the orthogonalized U<sub>ij</sub> tensor.

| Atom  | x       | y        | z       | U(eq) |
|-------|---------|----------|---------|-------|
| Br(1) | 1173(1) | 830(1)   | 3176(1) | 64(1) |
| P(1)  | 1077(1) | 9047(1)  | 6693(1) | 44(1) |
| C(1)  | 2051(1) | 8920(3)  | 6601(2) | 53(1) |
| C(2)  | 2286(1) | 8825(3)  | 5469(2) | 53(1) |
| C(3)  | 3109(1) | 8874(3)  | 5373(2) | 52(1) |
| C(4)  | 3318(1) | 8836(3)  | 4230(2) | 53(1) |
| C(5)  | 4135(1) | 8870(3)  | 4091(2) | 54(1) |
| C(6)  | 4340(1) | 8855(3)  | 2952(2) | 52(1) |
| C(7)  | 5158(1) | 8870(3)  | 2808(2) | 54(1) |
| C(8)  | 5366(1) | 8861(3)  | 1673(2) | 55(1) |
| C(9)  | 6188(1) | 8880(3)  | 1543(2) | 56(1) |
| C(10) | 6405(1) | 8870(3)  | 408(2)  | 58(1) |
| C(11) | 7220(2) | 8917(3)  | 286(2)  | 68(1) |
| C(12) | 7431(2) | 8903(4)  | -854(3) | 96(1) |
| C(1A) | 735(1)  | 10919(3) | 6096(2) | 57(1) |
| C(1B) | 654(1)  | 7295(3)  | 6042(2) | 58(1) |
| C(1C) | 874(2)  | 9030(4)  | 8051(2) | 60(1) |

**Table SI-3.** Torsion angles (°) for 12ATMP·Br.

|                        |            |
|------------------------|------------|
| C(1A)-P(1)-C(1)-C(2)   | -63.2(2)   |
| C(1B)-P(1)-C(1)-C(2)   | 57.0(2)    |
| C(1C)-P(1)-C(1)-C(2)   | 176.72(19) |
| P(1)-C(1)-C(2)-C(3)    | 174.81(18) |
| C(1)-C(2)-C(3)-C(4)    | -178.1(2)  |
| C(2)-C(3)-C(4)-C(5)    | -179.6(2)  |
| C(3)-C(4)-C(5)-C(6)    | -179.2(2)  |
| C(4)-C(5)-C(6)-C(7)    | -179.4(2)  |
| C(5)-C(6)-C(7)-C(8)    | -179.8(2)  |
| C(6)-C(7)-C(8)-C(9)    | 179.9(2)   |
| C(7)-C(8)-C(9)-C(10)   | 179.9(2)   |
| C(8)-C(9)-C(10)-C(11)  | 179.1(2)   |
| C(9)-C(10)-C(11)-C(12) | 179.9(2)   |

**Table SI-4.** Crystallographic  $a$  and  $\beta$  values of the  $n$ ATMP·Br salts used for the simulations of the crystal lattices to obtain their respective SAXS and WAXS profiles.

| $n$ ATMP·Br     | <sup>b</sup> $a$ (nm) | $\beta$ (°) |
|-----------------|-----------------------|-------------|
| <sup>a</sup> 12 | 1.83                  | 93.1        |
| 14              | 2.05                  | 97.0        |
| 16              | 2.25                  | 101.0       |
| 18              | 2.47                  | 103.5       |
| 20              | 2.70                  | 106.0       |
| 22              | 2.92                  | 108.0       |

<sup>a</sup> $a$  and  $\beta$  values of 12ATMP·Br are based on the experimental results of 12ATMP·Br.

<sup>b</sup> $b$  and  $c$  parameters and  $\alpha$  and  $\gamma$  angles of all the cells are fixed ( $b = 0.7965$  and  $c = 1.2672$  nm,  $\alpha = \gamma = 90^\circ$ ), according to the experimental result of 12ATMP·Br.
